# Supplementary material for: Differential Sensitivity of Two Leukemia Cell Lines towards Two Major Gas Plasma Products Hydrogen Peroxide and Hypochlorous Acid
Source: MDPI journal article supplement (doi:10.3390/app12157429), 2022-07-24
Supplement: s1 [file s1]

## Supplementary Figures

### Supplementary Figure S1

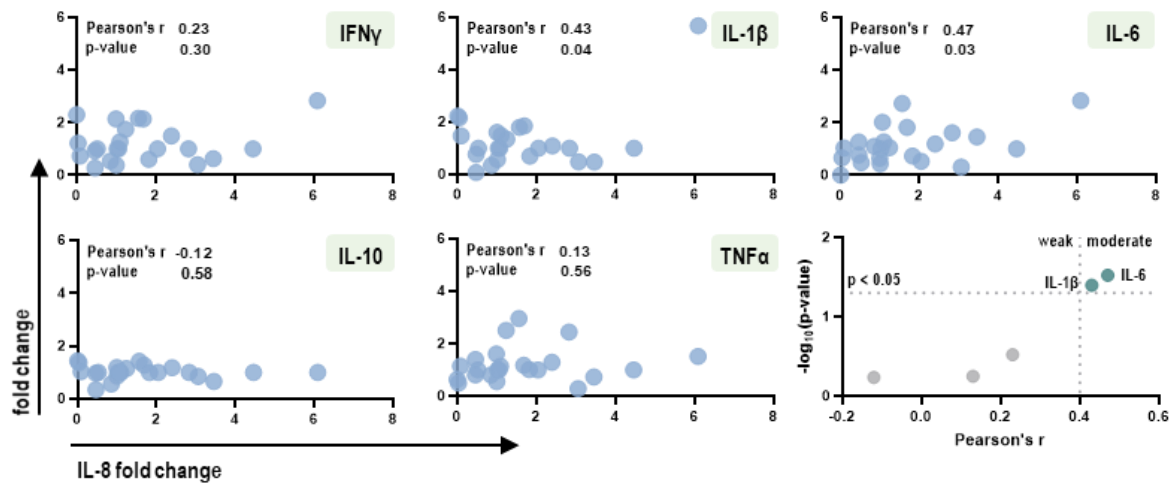

**Supplementary Figure S1: Plasma-induced IL-8 release correlates with release of IL-1 $\beta$  and IL-6.**  
Pearson's correlation analysis of plasma-induced interleukin (IL-)8 release with IFN $\gamma$ , IL-1 $\beta$ , IL-6, IL-10, and TNF $\alpha$ .
